# Supplementary material for: Excitation of vibrational soft modes in disordered systems using active oscillation
Source: Royal Society of Chemistry journal article supplement (doi:10.1039/c6sm00788k), 2016-05-12
Supplement: c6sm00788k1.pdf [file c6sm00788k1.pdf]

## Supplementary information: Excitation of vibrational soft modes in disordered systems using active oscillation

Elsen Tjhung<sup>1</sup> and Takeshi Kawasaki<sup>2,\*</sup>

<sup>1</sup>*Laboratoire Charles Coulomb, UMR 5221, CNRS and Université Montpellier, Montpellier 34095, France.*<sup>†</sup>

<sup>2</sup>*Department of Physics, Nagoya University, Nagoya 464-8602, Japan.*

(Dated: May 11, 2016)

PACS numbers: 05.10.-a, 61.43.-j

### I. NEWTONIAN DYNAMICS WITH FRICTION

In this section, we detail how we perform the Newtonian dynamic simulation (Eq. (2) of the main text) with a friction term  $\propto \xi$  and an active oscillation in the particles' diameters (Eq. (3) of the main text).

Our dynamical variables are the positions  $\{\mathbf{r}_i(t)\}$ , velocities  $\{\mathbf{v}_i(t)\}$ , and diameters of the particles  $\{\sigma_i(t)\}$ , where the index  $i = 1, 2, \dots, N$  labels the particle and  $N = 1000$  is the total number of particles in the system. We start our simulation at  $t = 0$  with all particles at rest:  $\mathbf{v}_i(0) = 0$ ,  $\forall i$ . We also assign a random position  $\mathbf{r}_i(0)$  for each particle  $i$  anywhere inside the simulation box. The initial particles' diameter  $\sigma_i(0)$  is either  $0.714\sigma$  or  $\sigma$  with a ratio 3 : 2 to avoid crystallization.

We then update the particles' positions and velocities according to Newtonian dynamics (Eq. (2) of the main text):

$$m \frac{d\mathbf{v}_i}{dt} + \xi \mathbf{v}_i = - \sum_{j=1, j \neq i}^N \frac{\partial V(r_{ij})}{\partial \mathbf{r}_i} \quad (1)$$

$$\mathbf{v}_i = \frac{d\mathbf{r}_i}{dt} \quad (2)$$

where  $m$  is the mass of each particle,  $\xi$  is the friction coefficient between the particles and the friction, and  $V(r_{ij})$  is the two body potential, given by:

$$V(r_{ij}) = \frac{\epsilon}{2} \left( 1 - \frac{r_{ij}}{\sigma_{ij}} \right)^2 H(r_{ij} - \sigma_{ij}) \quad (3)$$

where  $r_{ij} = |\mathbf{r}_i - \mathbf{r}_j|$  and  $\sigma_{ij} = (\sigma_i + \sigma_j)/2$ .  $H(x)$  is the Heaviside function, defined such that  $H(x) = 1$  if  $x \geq 0$  and  $H(x) = 0$  if  $x < 0$ . We also update the particles' diameters using a sinusoidal function:

$$\sigma_i(t) = \sigma_i(0) [1 + a \cos(\omega_d t + \psi_i)] \quad (4)$$

where  $a$  is the amplitude of active oscillation and  $\omega_d$  is the driving frequency. The phase difference  $\psi_i$  is chosen to be  $\psi_i = 2\pi i/N$  as this will conserve the global volume fraction. Note that by introducing an active oscillation in the particles' diameters (Eq. (4)), we drive the system out-of-equilibrium.

We then non-dimensionalize the equations of motion Eqs. (1,2) by rescaling the position and time by:

$$\begin{aligned} \mathbf{r}_i &\rightarrow \mathbf{r}_i/\sigma \\ t &\rightarrow \omega_0 t \end{aligned} \quad (5)$$

where  $\omega_0 = \sqrt{\frac{\epsilon}{m\sigma^2}}$  is the characteristic frequency defined in the main text. Subsequently Eq. (1) become:

$$\frac{d\mathbf{v}_i}{dt} + \xi \frac{\sigma}{\sqrt{m\epsilon}} \mathbf{v}_i = \mathbf{F}_i \quad (6)$$

---

\* Email: kawasaki@r.phys.nagoya-u.ac.jp

<sup>†</sup> Present address: Department of Applied Mathematics and Theoretical Physics, Centre for Mathematical Sciences, University of Cambridge, Wilberforce Road, Cambridge CB3 0WA, United Kingdom.

where

$$\mathbf{F}_i = \sum_{j=1, j \neq i}^N (1 - r_{ij}) H(r_{ij} - 1) \frac{\mathbf{r}_{ij}}{r_{ij}}. \quad (7)$$

Finally, putting in the definition of damping coefficient  $\zeta = \frac{\xi\sigma}{2\sqrt{m\epsilon}}$  from the main text, the dimensionless equations of motion are:

$$\frac{d\mathbf{v}_i}{dt} + 2\zeta\mathbf{v}_i = \mathbf{F}_i \quad (8)$$

$$\mathbf{v}_i = \frac{d\mathbf{r}_i}{dt} \quad (9)$$

In our simulations, we fix  $\zeta = 0.01$ .

Eqs. (8,9) are then discretized in time similar to velocity Verlet algorithm [1]:

$$\mathbf{r}_i(t + \Delta t) = \mathbf{r}_i(t) + \mathbf{v}_i(t)\Delta t (1 - \zeta\Delta t) + \frac{1}{2}\mathbf{F}_i(t)\Delta t^2 \quad (10)$$

$$\mathbf{v}_i\left(t + \frac{\Delta t}{2}\right) = \mathbf{v}_i(t) (1 - \zeta\Delta t) + \frac{1}{2}\mathbf{F}_i(t)\Delta t \quad (11)$$

$$\mathbf{v}_i(t + \Delta t) = (1 + \zeta\Delta t)^{-1} \left[ \mathbf{v}_i\left(t + \frac{\Delta t}{2}\right) + \frac{1}{2}\mathbf{F}_i(t + \Delta t)\Delta t \right], \quad (12)$$

where  $\Delta t \ll 1$  is the time interval. In our simulations, we fix  $\Delta t = 0.01$ . Thus, given  $\{\mathbf{r}_i(0), \mathbf{v}_i(0), \sigma_i(0)\}$ , we can update  $\{\mathbf{r}_i(t), \mathbf{v}_i(t), \sigma_i(t)\}$  using Eqs. (10,11,12,4).

We now give derivations of Eqs. (10,11,12). To derive Eq. (10), we first Taylor expand  $\mathbf{r}_i(t + \Delta t)$ :

$$\mathbf{r}_i(t + \Delta t) = \mathbf{r}_i(t) + \mathbf{v}_i(t)\Delta t + \frac{1}{2} \frac{d\mathbf{v}_i(t)}{dt} \Delta t^2 + \mathcal{O}(\Delta t^3).$$

Substituting Eq. (8), we obtain:

$$\mathbf{r}_i(t + \Delta t) = \mathbf{r}_i(t) + \mathbf{v}_i(t)\Delta t + \frac{1}{2} (\mathbf{F}_i(t) - 2\zeta\mathbf{v}_i(t)) \Delta t^2 + \mathcal{O}(\Delta t^3) \quad (13)$$

$$= \mathbf{r}_i(t) + \mathbf{v}_i(t)\Delta t (1 - \zeta\Delta t) + \frac{1}{2}\mathbf{F}_i(t)\Delta t^2 + \mathcal{O}(\Delta t^3). \quad (14)$$

To derive Eq. (11), we Taylor expand  $\mathbf{v}_i\left(t + \frac{\Delta t}{2}\right)$  to obtain:

$$\mathbf{v}_i\left(t + \frac{\Delta t}{2}\right) = \mathbf{v}_i(t) + \frac{1}{2} \frac{d\mathbf{v}_i(t)}{dt} \Delta t + \mathcal{O}(\Delta t^2). \quad (15)$$

Substituting Eq. (8), we obtain:

$$\mathbf{v}_i\left(t + \frac{\Delta t}{2}\right) = \mathbf{v}_i(t) + \frac{1}{2} (\mathbf{F}_i(t) - 2\zeta\mathbf{v}_i(t)) \Delta t + \mathcal{O}(\Delta t^2) \quad (16)$$

$$= \mathbf{v}_i(t) (1 - \zeta\Delta t) + \frac{1}{2}\mathbf{F}_i(t)\Delta t + \mathcal{O}(\Delta t^2). \quad (17)$$

Finally to derive Eq. (12), we Taylor expand  $\mathbf{v}_i\left(t + \frac{\Delta t}{2}\right)$  to obtain:

$$\mathbf{v}_i\left(t + \frac{\Delta t}{2}\right) = \mathbf{v}_i(t + \Delta t) - \frac{1}{2} \frac{d\mathbf{v}_i(t + \Delta t)}{dt} \Delta t + \mathcal{O}(\Delta t^2). \quad (18)$$

Substituting Eq. (8), we obtain:

$$\mathbf{v}_i\left(t + \frac{\Delta t}{2}\right) = \mathbf{v}_i(t + \Delta t) - \frac{1}{2} [\mathbf{F}_i(t + \Delta t) - 2\zeta\mathbf{v}_i(t + \Delta t)] \Delta t + \mathcal{O}(\Delta t^2) \quad (19)$$

and thus we recover Eq. (12).

## II. NORMAL MODE ANALYSIS

In this section, we detail how to obtain the normal eigenmodes from a static configuration close to a local potential energy minimum [2]. The total potential energy is obtained by summing all the two body potential  $V(r_{ij})$ :

$$U(\mathbf{r}^N) = \frac{1}{2} \sum_i \sum_{j \neq i} V(r_{ij}) \quad (20)$$

where  $\mathbf{r}^N = (\mathbf{r}_1, \mathbf{r}_2, \dots, \mathbf{r}_N)^T$ . The Hessian matrix  $\mathbf{H}_{ij}$  is defined to be the second derivative of the total potential energy with respect to the positions of the particles:

$$\mathbf{H}_{ij} = \frac{\partial^2 U}{\partial \mathbf{r}_i \partial \mathbf{r}_j}. \quad (21)$$

More explicitly, the Hessian matrix can be written as:

$$\mathbf{H} = \begin{pmatrix} \frac{\partial^2 U}{\partial x_1 \partial x_1} & \frac{\partial^2 U}{\partial x_1 \partial y_1} & \frac{\partial^2 U}{\partial x_1 \partial x_2} & \cdots & \frac{\partial^2 U}{\partial x_1 \partial y_N} \\ \frac{\partial^2 U}{\partial y_1 \partial x_1} & \frac{\partial^2 U}{\partial y_1 \partial y_1} & & & \vdots \\ \frac{\partial^2 U}{\partial x_2 \partial x_1} & & \ddots & & \\ \vdots & & & \ddots & \\ \frac{\partial^2 U}{\partial y_N \partial x_1} & \cdots & & & \frac{\partial^2 U}{\partial y_N \partial y_N} \end{pmatrix} \quad (22)$$

where  $(x_i, y_i)$  are the Cartesian coordinates of  $\mathbf{r}_i$ . The components of the Hessian matrix can be calculated as follow:

$$\begin{aligned} \frac{\partial^2 U}{\partial x_i \partial x_i} &= \sum_{j \neq i} \left\{ V''(r_{ij}) \left( \frac{x_i - x_j}{r_{ij}} \right)^2 + V'(r_{ij}) \frac{1}{r_{ij}} \left( 1 - \left( \frac{x_i - x_j}{r_{ij}} \right)^2 \right) \right\} \\ \frac{\partial^2 U}{\partial y_i \partial y_i} &= \sum_{j \neq i} \left\{ V''(r_{ij}) \left( \frac{y_i - y_j}{r_{ij}} \right)^2 + V'(r_{ij}) \frac{1}{r_{ij}} \left( 1 - \left( \frac{y_i - y_j}{r_{ij}} \right)^2 \right) \right\} \\ \frac{\partial^2 U}{\partial x_i \partial x_j} &= -V''(r_{ij}) \left( \frac{x_i - x_j}{r_{ij}} \right)^2 + V'(r_{ij}) \frac{1}{r_{ij}} \left( 1 + \left( \frac{x_i - x_j}{r_{ij}} \right)^2 \right) \\ \frac{\partial^2 U}{\partial y_i \partial y_j} &= -V''(r_{ij}) \left( \frac{y_i - y_j}{r_{ij}} \right)^2 + V'(r_{ij}) \frac{1}{r_{ij}} \left( 1 + \left( \frac{y_i - y_j}{r_{ij}} \right)^2 \right) \\ \frac{\partial^2 U}{\partial x_i \partial y_i} &= \sum_{j \neq i} \left\{ V''(r_{ij}) \left( \frac{x_i - x_j}{r_{ij}} \right) \left( \frac{y_i - y_j}{r_{ij}} \right) - V'(r_{ij}) \frac{1}{r_{ij}} \left( \frac{x_i - x_j}{r_{ij}} \right) \left( \frac{y_i - y_j}{r_{ij}} \right) \right\} \\ \frac{\partial^2 U}{\partial x_i \partial y_j} &= -V''(r_{ij}) \left( \frac{x_i - x_j}{r_{ij}} \right) \left( \frac{y_i - y_j}{r_{ij}} \right) + V'(r_{ij}) \frac{1}{r_{ij}} \left( \frac{x_i - x_j}{r_{ij}} \right) \left( \frac{y_i - y_j}{r_{ij}} \right) \end{aligned} \quad (23)$$

where  $V'$  and  $V''$  are the first and second derivative of the two body potential respectively. The normal eigenmodes  $\{\mathbf{e}_\omega\}$  and eigenfrequencies  $\{\omega\}$  are then obtained by solving the eigenvalue equation:

$$\mathbf{H} \cdot \mathbf{e}_\omega = \omega^2 \mathbf{e}_\omega \quad (24)$$

where the Hessian matrix is evaluated at some static configuration  $\mathbf{r}_0^N$  close to a local potential energy minimum. Eq. (24) can be solved using standard Jacobi iteration method [3] to obtain a set of eigenmodes  $\{\mathbf{e}_\omega\}$  and corresponding eigenfrequencies  $\{\omega\}$ .

- 
- [1] L. Verlet, Computer "Experiments" on Classical Fluids. I. Thermodynamical Properties of Lennard Jones Molecules, *Phys. Rev.* **159** (1967) 98-103.  
[2] N. W. Ashcroft and N. D. Mermin, Solid State Physics, (Thomson Learning 1976).  
[3] W. H. Press, B. P. Flannery, S. A. Teukolsky, W. T. Vetterling Numerical Recipes in C: The Art of Scientific Computing, Second Edition, (Cambridge University Press 1992).
